# Supplementary material for: High‐throughput phenotyping reveals differential transpiration behaviour within the banana wild relatives highlighting diversity in drought tolerance
Source: PubMed Central journal article supplement — Plant Cell Environ. 2022 Mar 28;45(6):1647–63. doi: 10.1111/pce.14310 (PMC9310827; doi:10.1111/pce.14310), 2022-03-28
Supplement: PCE-45-1647-s001.pdf [file PCE-45-1647-s001.pdf]

## Supplementary Figures

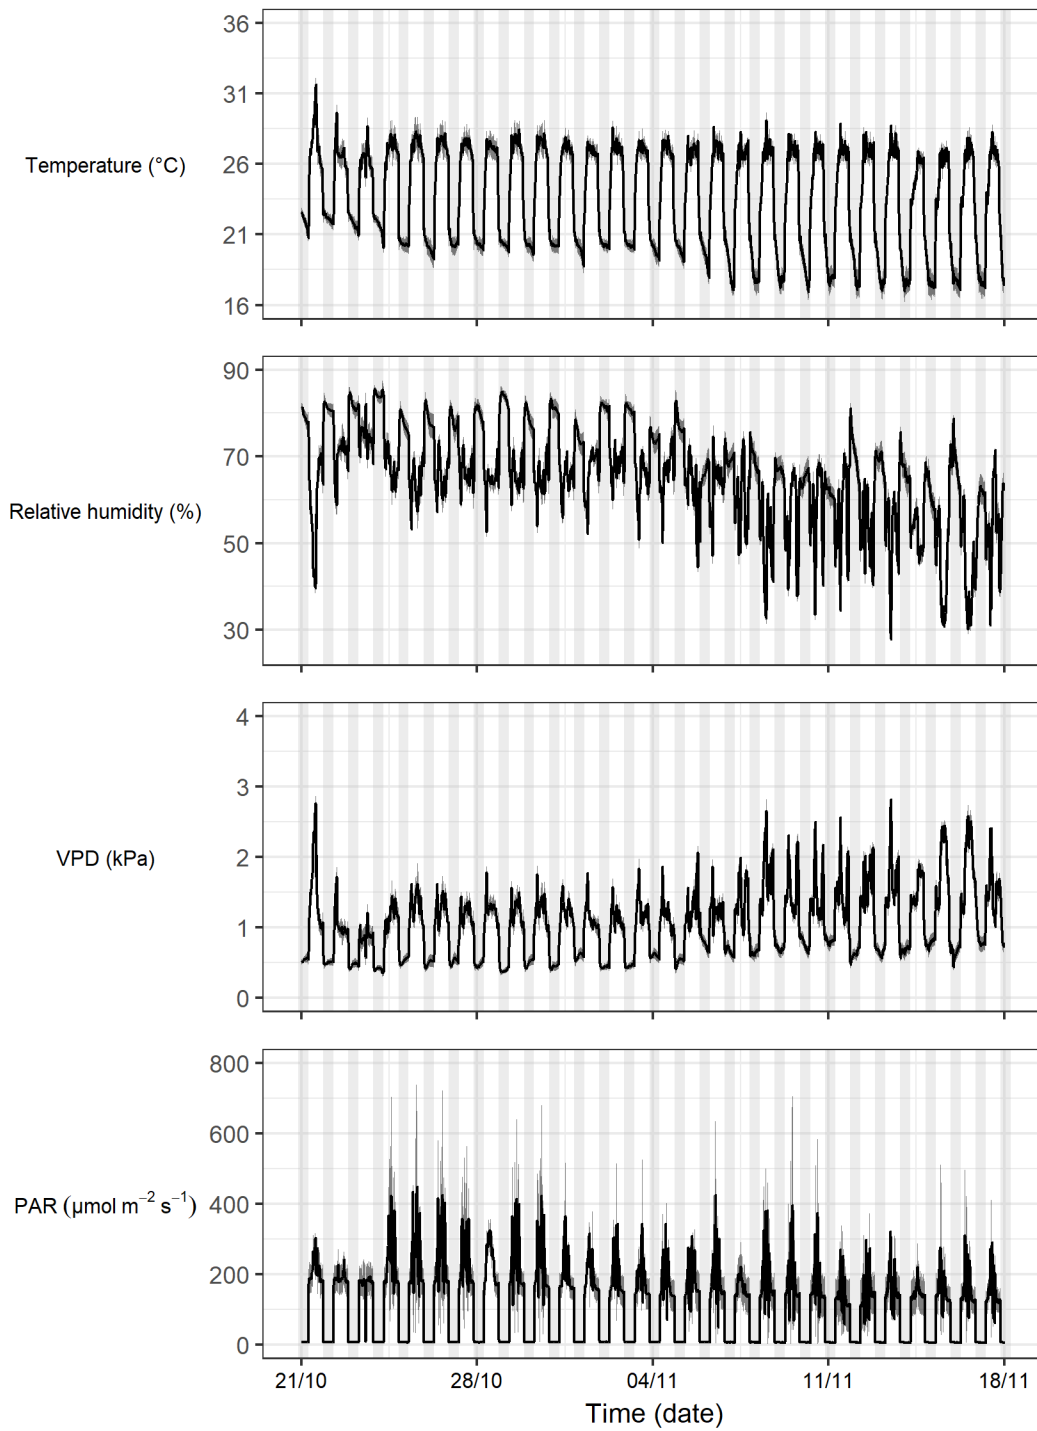

*Supplemental Figure S1: Environmental conditions measured during the high-throughput phenotyping experiment at the Phenodyn platform. Data are the mean  $\pm$  stdev of 6 environmental sensors evenly distributed across the greenhouse.*

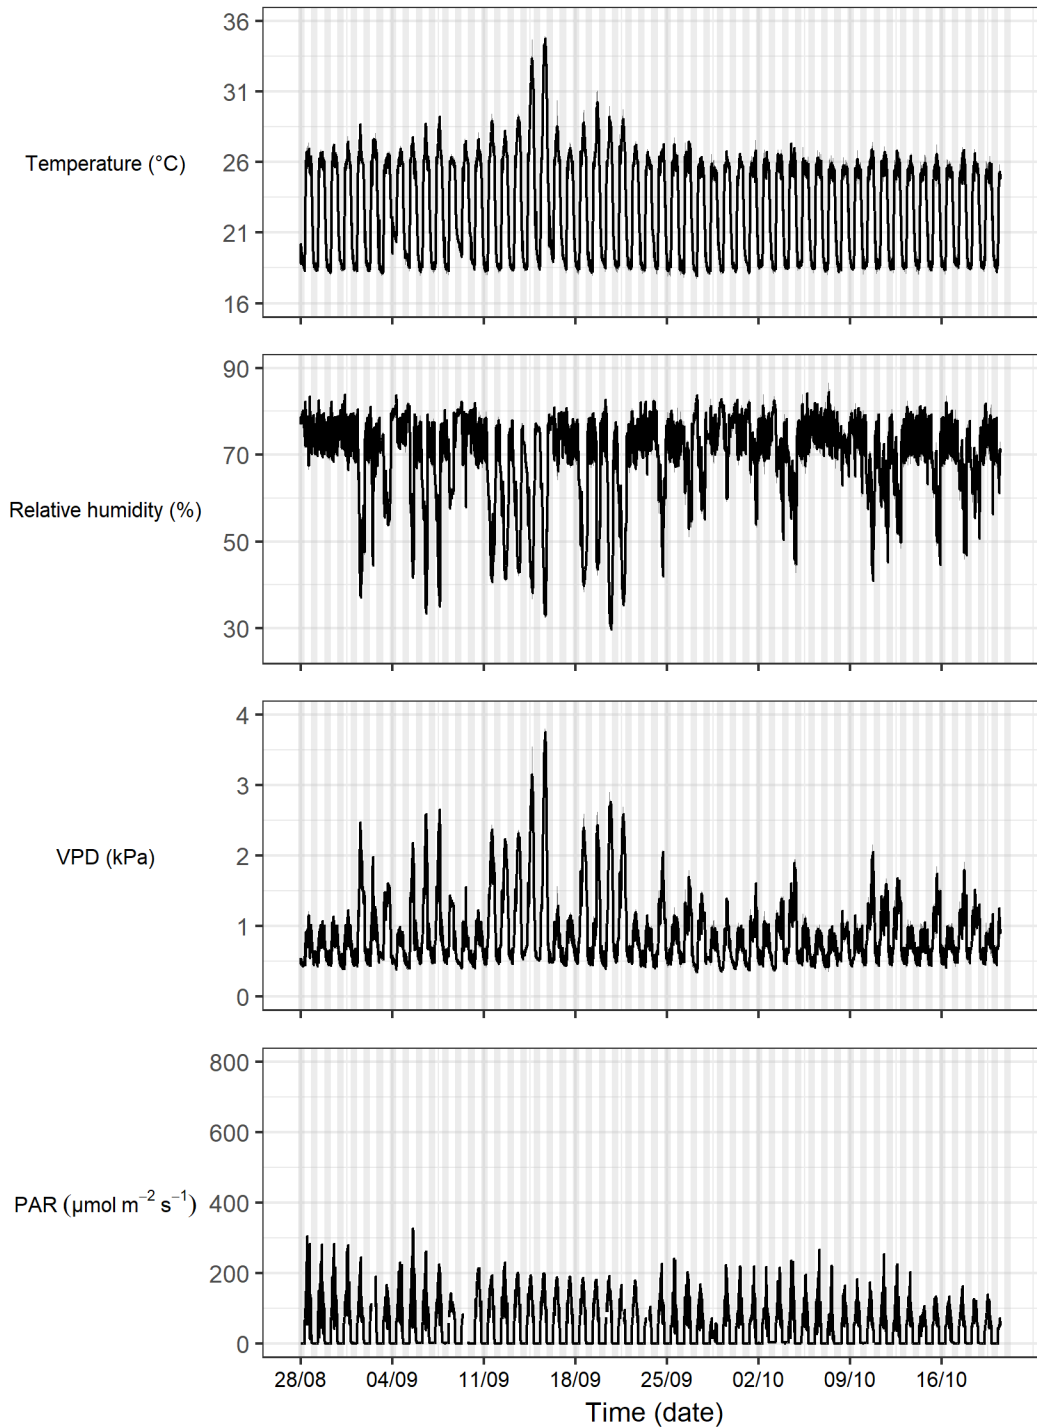

*Supplemental Figure S2: Environmental conditions measured during the validation experiment at the Bioversity phenotyping platform. Data of temperature, relative humidity and VPD are the mean  $\pm$  stdev of 8 environmental sensors evenly distributed across the greenhouse. Light intensity was measured in the middle of the greenhouse.*

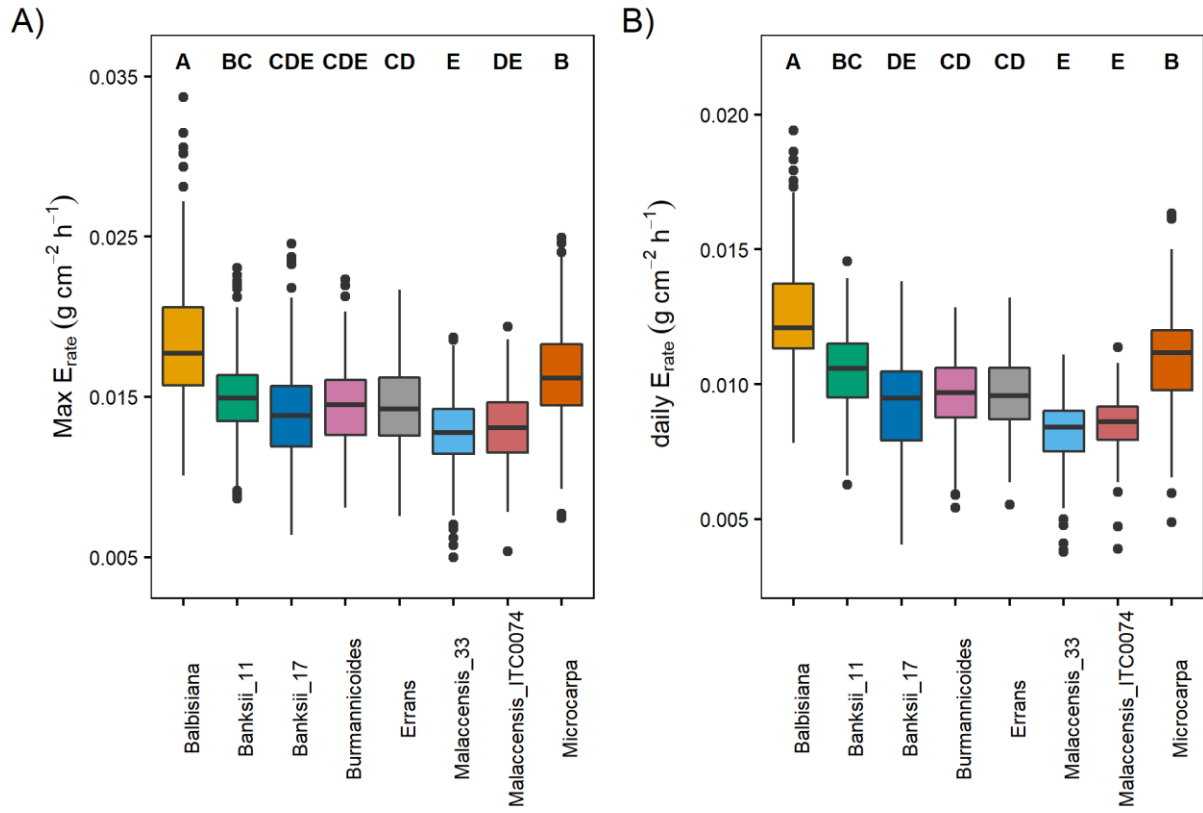

Supplemental Figure S3: Maximum daily transpiration rate (A) and daily transpiration rate (B) under well-watered conditions differed significantly across 8 wild banana genotypes. Different letters indicate significant differences ( $P < 0.05$ ;  $A > B > C > D > E$ ) (29 days,  $n=8$  per genotype).

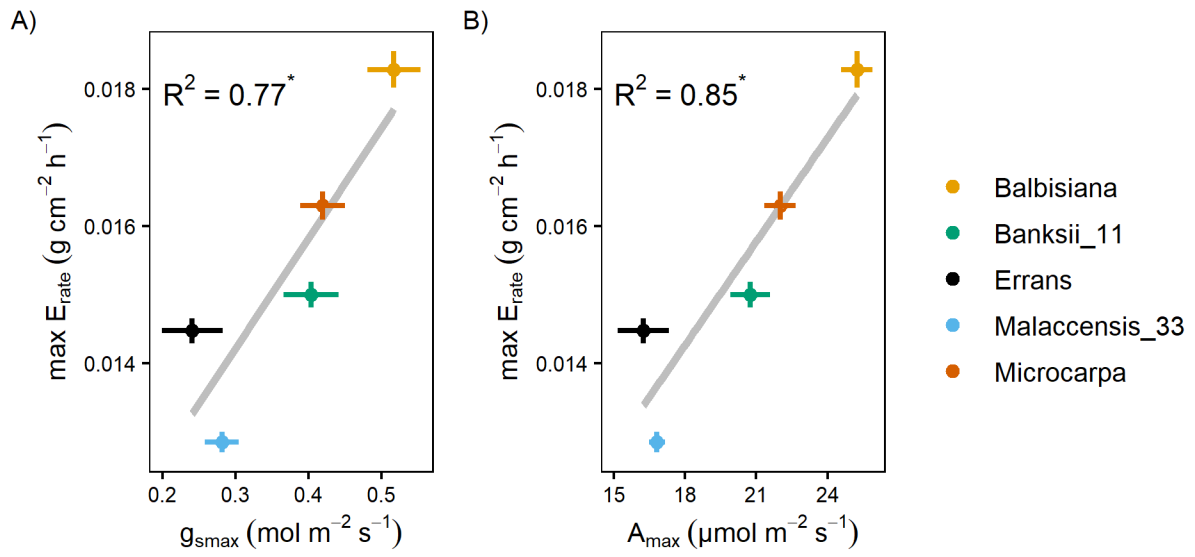

Supplemental Figure S4: Maximum daily transpiration rate was significantly correlated with (A) maximum stomatal conductance ( $g_{s,\text{max}}$ ) and (B) photosynthesis ( $A_{\text{max}}$ ) for 5 selected wild banana genotypes. Data represent mean $\pm$ se and  $R^2$  values represent the correlation across the means for every genotype (Transpiration rate: 29 days, 8 plants per genotype; gas-exchange data: n=6-8).

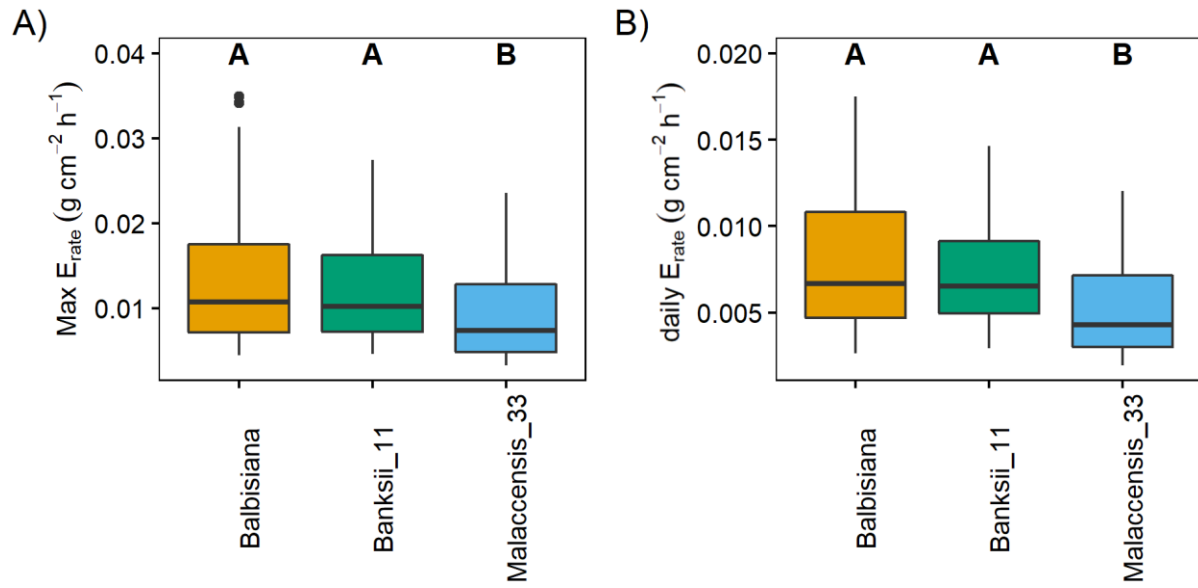

Supplemental Figure S5: Maximum transpiration rate (A) and daily transpiration rate (B) under well-watered conditions differed significantly across 3 wild banana genotypes during the validation phenotyping experiment. Different letters indicate significant differences ( $P < 0.05$ ; A>B) (48 days,  $n=4$  per genotype).

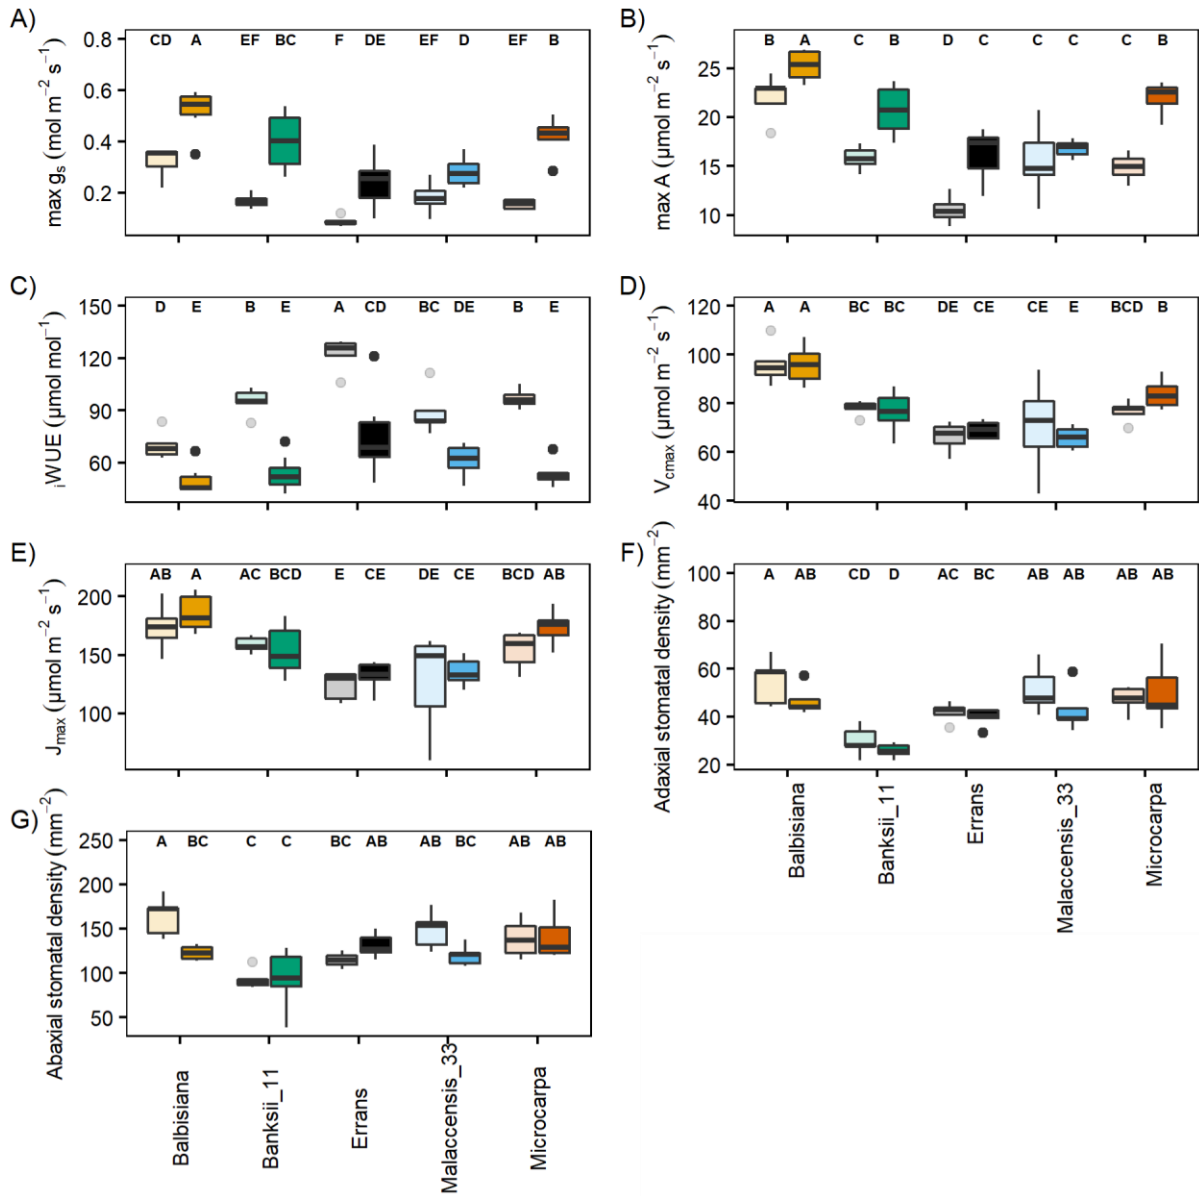

Supplemental Figure S6: Gas exchange data and stomatal density of 5 representative wild banana genotypes. (A) Maximum stomatal conductance ( $g_{s,max}$ ); (B) maximum photosynthesis ( $A_{max}$ ); (C) intrinsic water use efficiency ( $\iota WUE$ ), (D) maximum rate of Rubisco activity ( $V_{c,max}$ ), (E) the potential rate of electron transport ( $J_{max}$ ), (F) Adaxial stomatal density and (G) Abaxial stomatal density. Faded colours represent water deficit plants (SWC 0.75 g g<sup>-1</sup>, -0.13 MPa), bold colours well-watered plants (n=5-8).

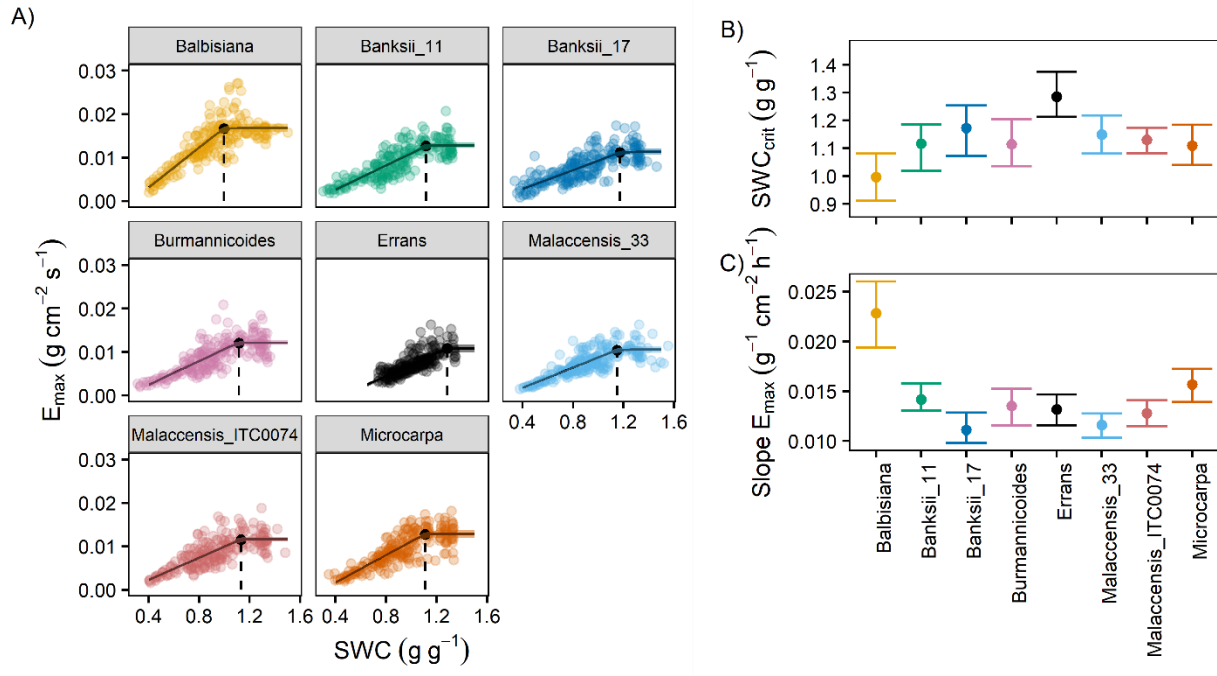

Supplemental Figure S7: Maximum daily transpiration rate ( $E_{max}$ ) as a function of soil water content (SWC) for 8 wild banana genotypes. (A)  $E_{max}$  did not differ from well-watered conditions until a critical soil water content threshold ( $SWC_{crit}$ ) was reached. After this  $SWC_{crit}$ , water content becomes limiting and  $E_{max}$  decreased strongly. The black line represent modelled response according to Eq. 12 with  $SWC_{crit}$  indicated by the solid black line. (B)  $SWC_{crit}$  at which  $E_{max}$  started to decrease. Data represent the modelled parameter with 95% confidence interval. (C) Slope of  $E_{max}$  decrease after  $SWC_{crit}$  was reached. Data represent the modelled parameter with 95% confidence interval.

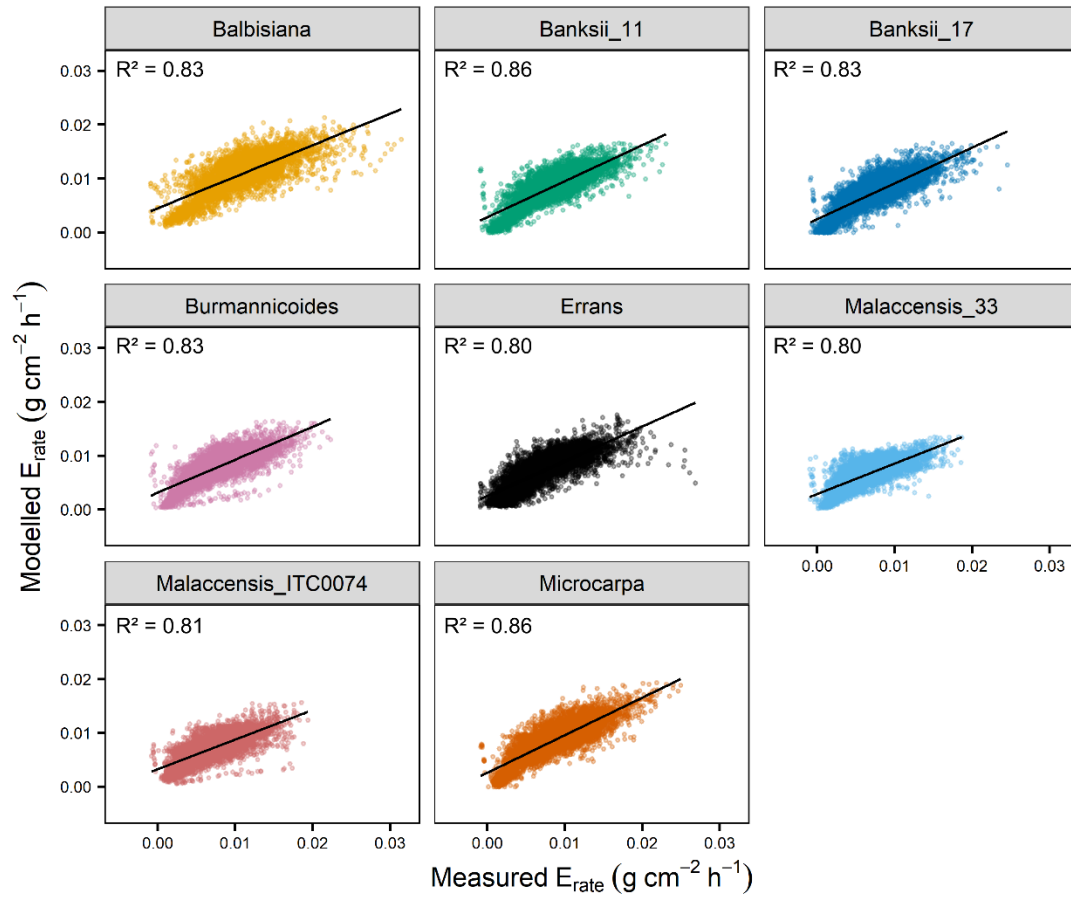

Supplemental Figure S8: Measured and modelled transpiration rate during the daytime for 8 wild banana genotypes. The black line represents the linear regression between measured and modelled transpiration rate.



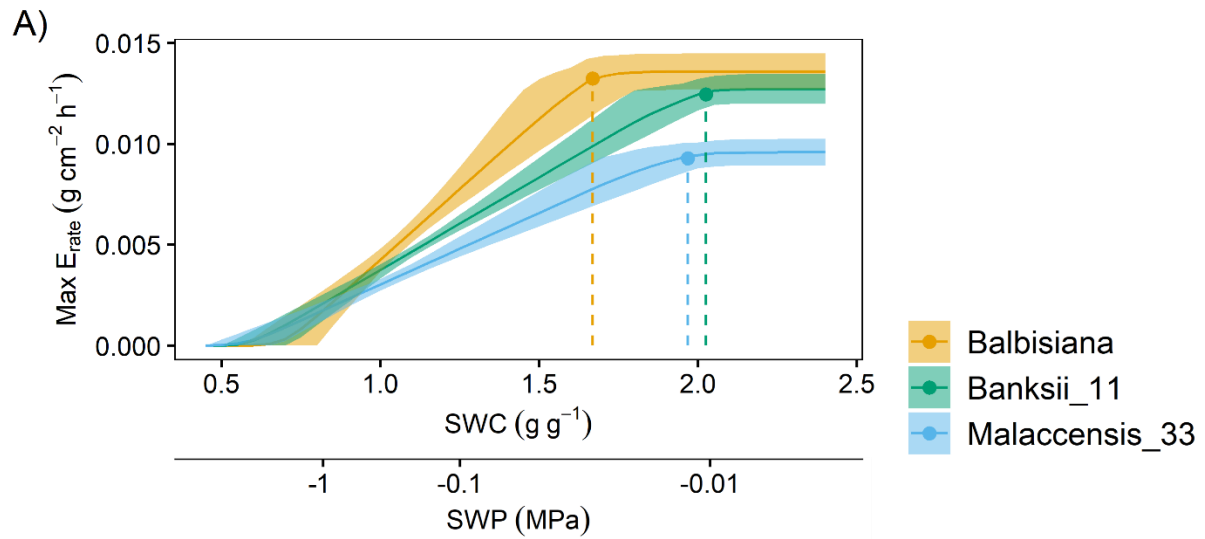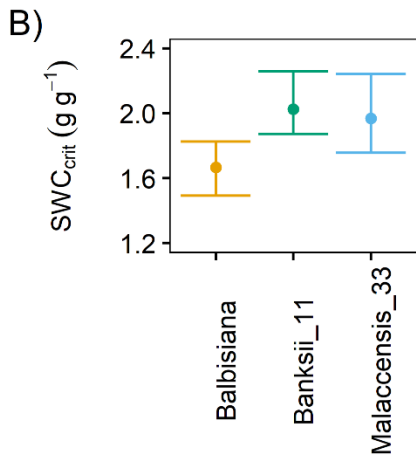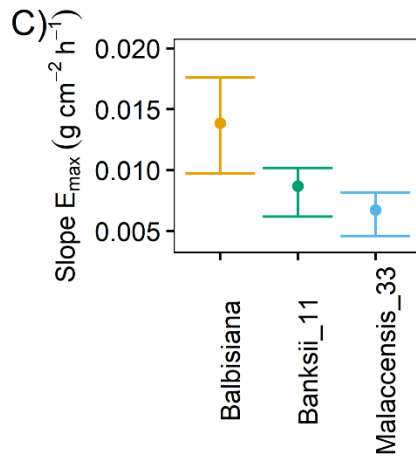

Supplemental Figure S9: Maximum daily transpiration rate ( $E_{max}$ ) as a function of soil water content (SWC) and soil water potential (SWP) for 3 wild banana genotypes during the validation phenotyping experiment. (A)  $E_{max}$  did not differ from well-watered conditions until a critical soil water content threshold ( $SWC_{crit}$ ) was reached. After this  $SWC_{crit}$ , water content becomes limiting and  $E_{max}$  decreased strongly. Data represent modelled response according to Eq. 12 with 95% confidence interval. Note the logarithmic scale of the soil water potential. (B)  $SWC_{crit}$  at which  $E_{max}$  started to decrease. Data represent the modelled parameter with 95% confidence interval. (C) Slope of  $E_{max}$  decrease after  $SWC_{crit}$  was reached. Data represent the modelled parameter with 95% confidence interval.

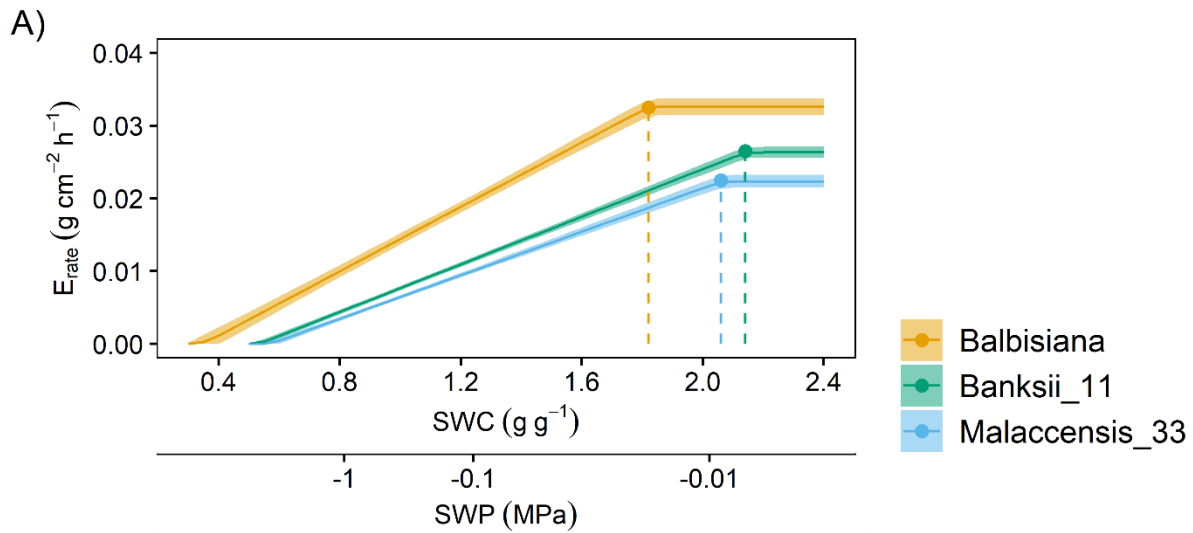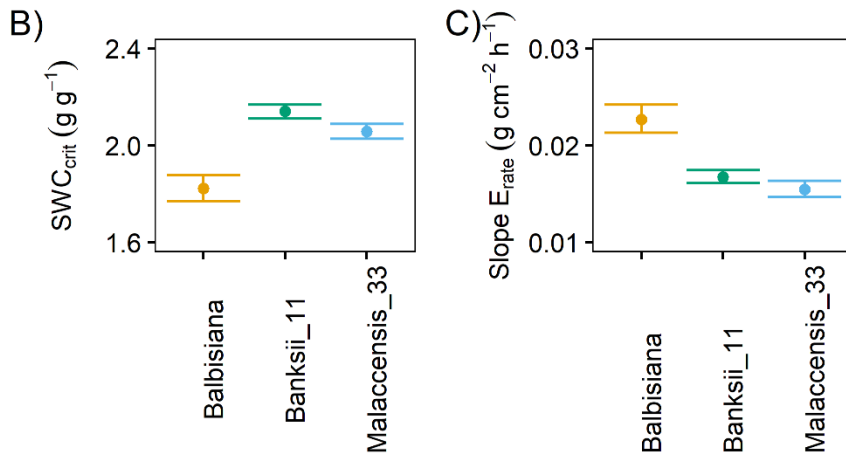

Supplemental Figure S10: Modelled transpiration rate ( $E_{rate}$ ; Eq. 9) as a function of soil water content (SWC) and soil water potential (SWP) for 3 wild banana genotypes during the validation phenotyping experiment. (A)  $E_{rate}$  did not differ from well-watered conditions until a critical soil water content threshold ( $\text{SWC}_{crit}$ ) was reached. After this  $\text{SWC}_{crit}$ , water content becomes limiting and  $E_{max}$  decreased strongly. Data represent modelled response according to Eq 12 with 95% confidence interval at VPD = 1.5 kPa and PAR = 200  $\mu\text{mol m}^{-2} \text{s}^{-1}$ . Note the logarithmic scale of the soil water potential. (B)  $\text{SWC}_{crit}$  at which  $E_{max}$  started to decrease. Data represent the modelled parameter with 95% confidence interval. (C) Slope of  $E_{max}$  decrease after the  $\text{SWC}_{crit}$  was reached. Data represent the modelled parameter with 95% confidence interval.

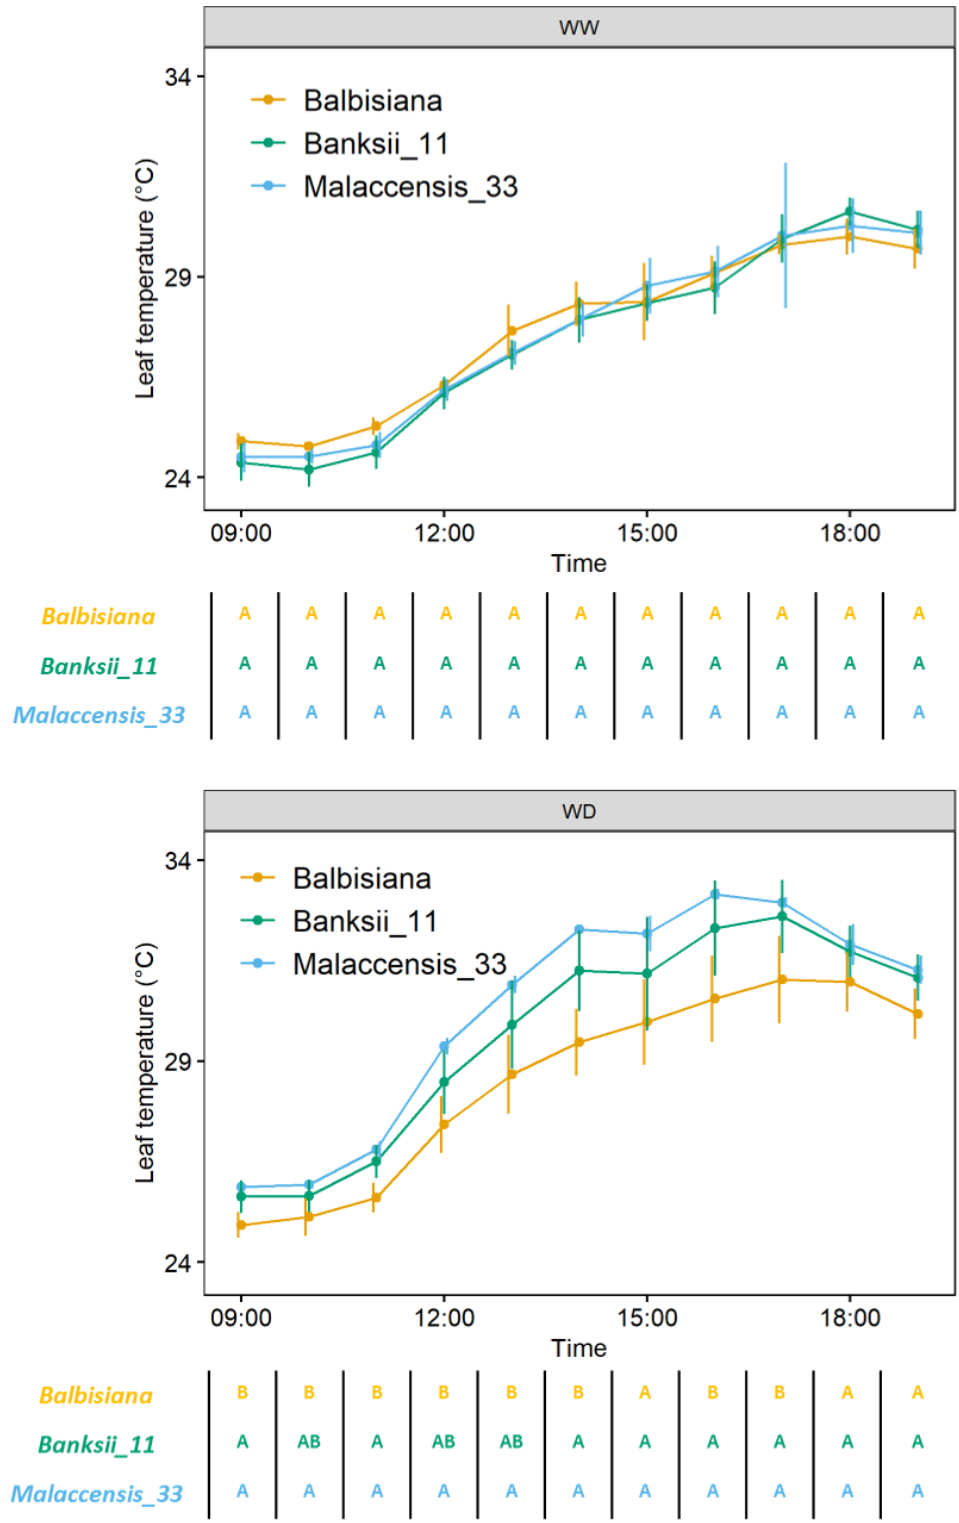

Supplemental Figure S11: Leaf temperature development across 3 wild banana genotypes during the validation phenotyping experiment. Data represent the mean  $\pm$  stdev ( $n=4$  per treatment and genotype, ( $P < 0.05$ ;  $A>B$ )).

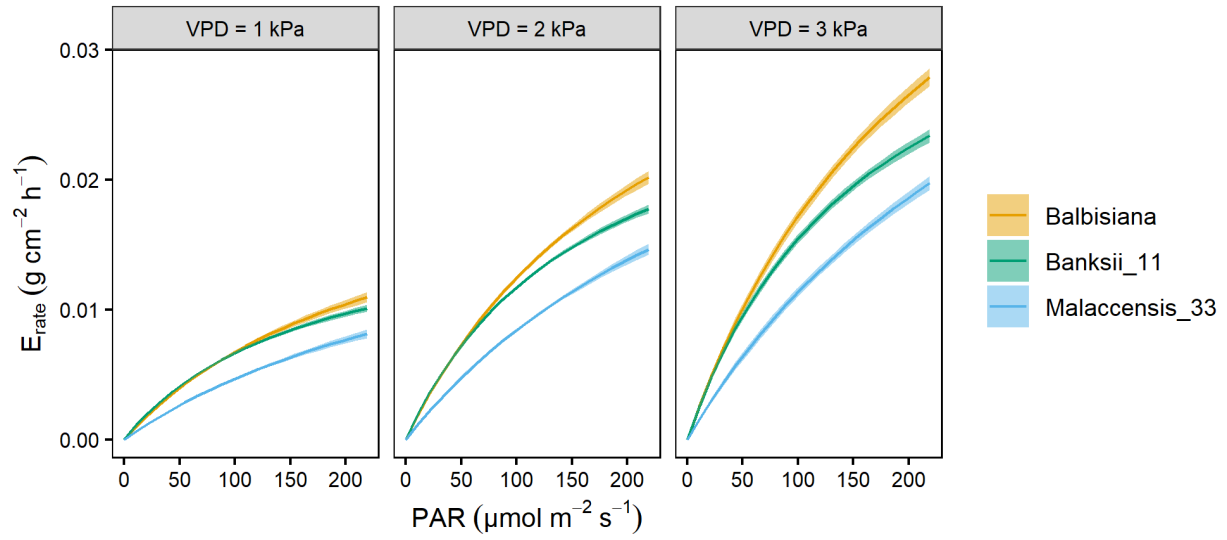

Supplemental Figure S12: Modelled transpiration rate response as a function of light intensity (PAR; photosynthetic active radiation) for the validation phenotyping experiment under well-watered conditions at three VPD levels (1, 2 and 3 kPa). Data represent the modelled response according to Eq. 10 with 95% confidence interval.

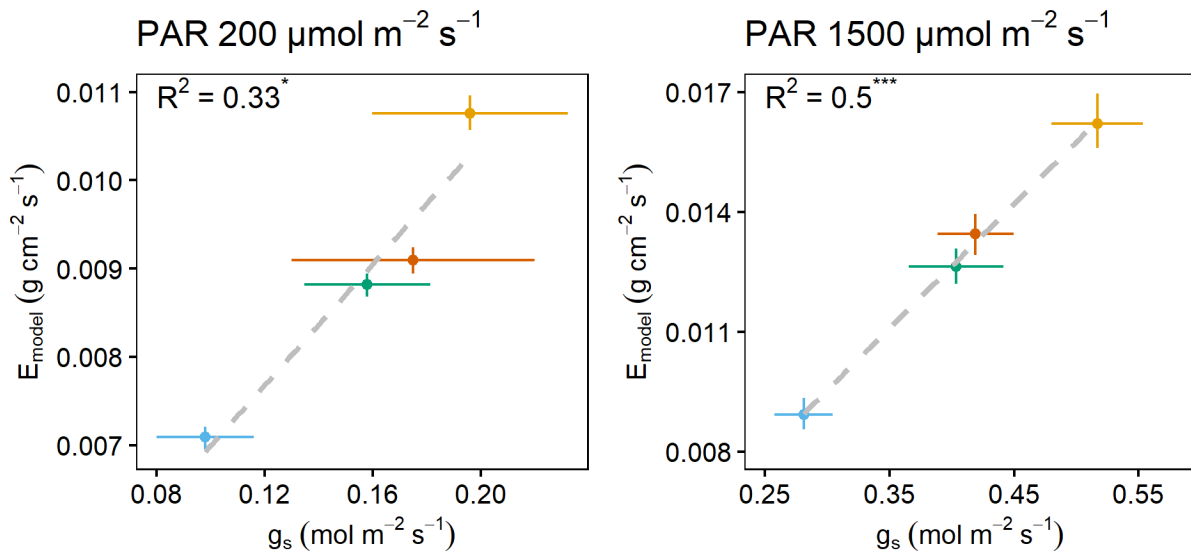

Supplemental Figure S13: Modelled transpiration rate at light intensity of 200 and 1500  $\mu\text{mol m}^{-2} \text{s}^{-1}$  are significantly correlated to mean gas exchange measurements at these light intensities for 4 wild banana genotypes (\* for  $P < 0.05$ , \*\* for  $P < 0.001$ ,  $n_{\text{PAR}200} = 2-5$ ,  $n_{\text{PAR}1500} = 6-8$ ).

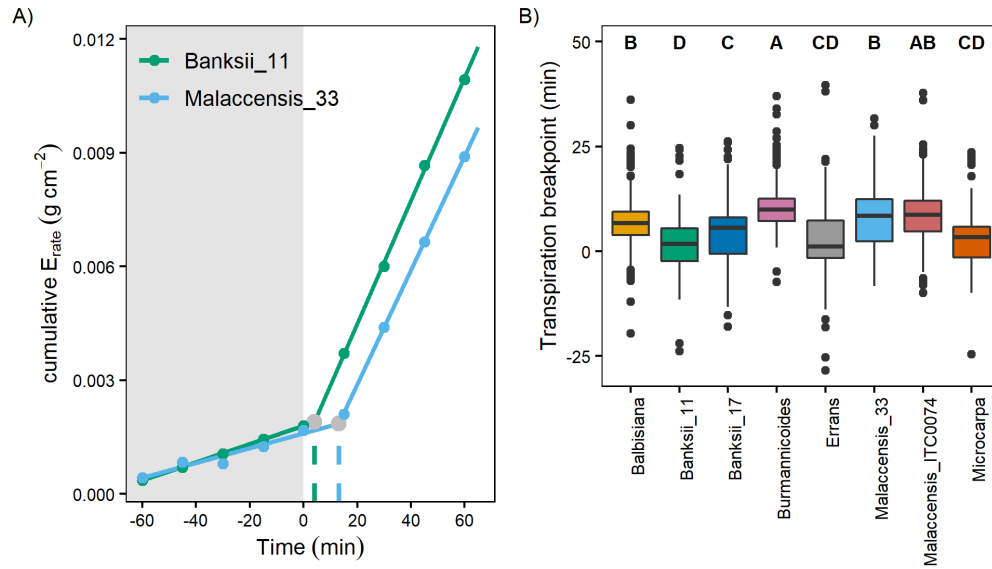

Supplemental Figure S14: Transpiration response during the first hour after light onset. (A) A breakpoint in cumulative transpiration was determined, representing the speed of transpiration rate increase. Data show two representative individuals of the genotypes *M. acuminata* ssp. *banksii* and *malaccensis* on a similar day. Grey bullet represents the time at which a significant increase in transpiration rate was observed. Grey areas indicate times of darkness. (B) The breakpoint in morning transpiration differed significantly in 8 wild banana genotypes ( $P < 0.05$ ;  $A > B > C > D$ ) (29 days,  $n=8$  per genotype).

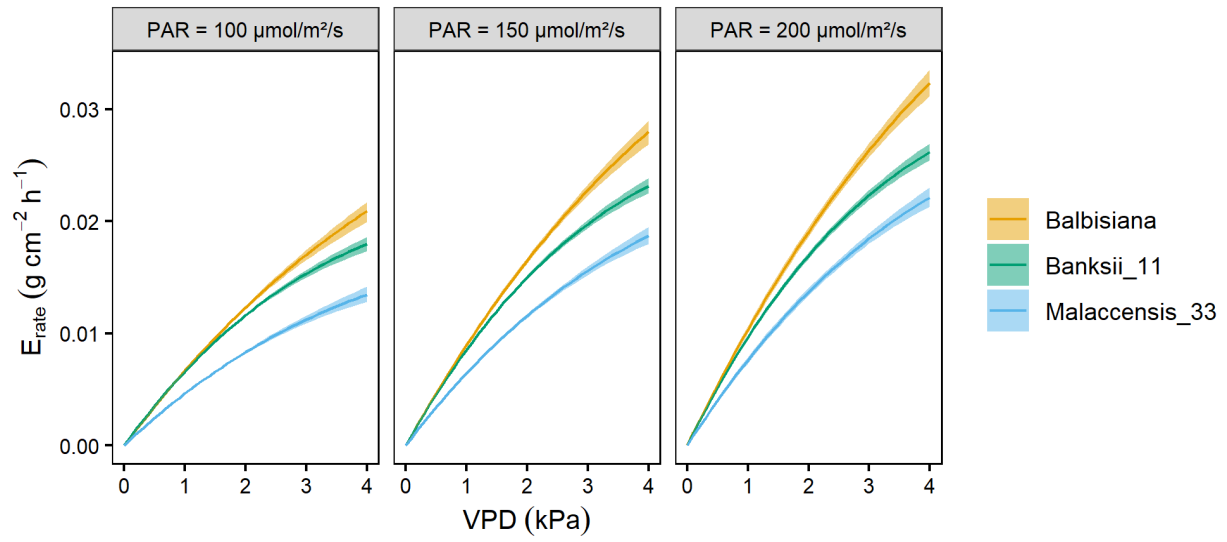

Supplemental Figure S15: Modelled transpiration rate response as a function of vapour pressure deficit (VPD) under well-watered conditions at three light levels (photosynthetic active radiation (PAR) 100, 150 and 200  $\mu\text{mol m}^{-2} \text{s}^{-1}$ ). Data represent the modelled response according to Eq. 11 with 95% confidence interval.

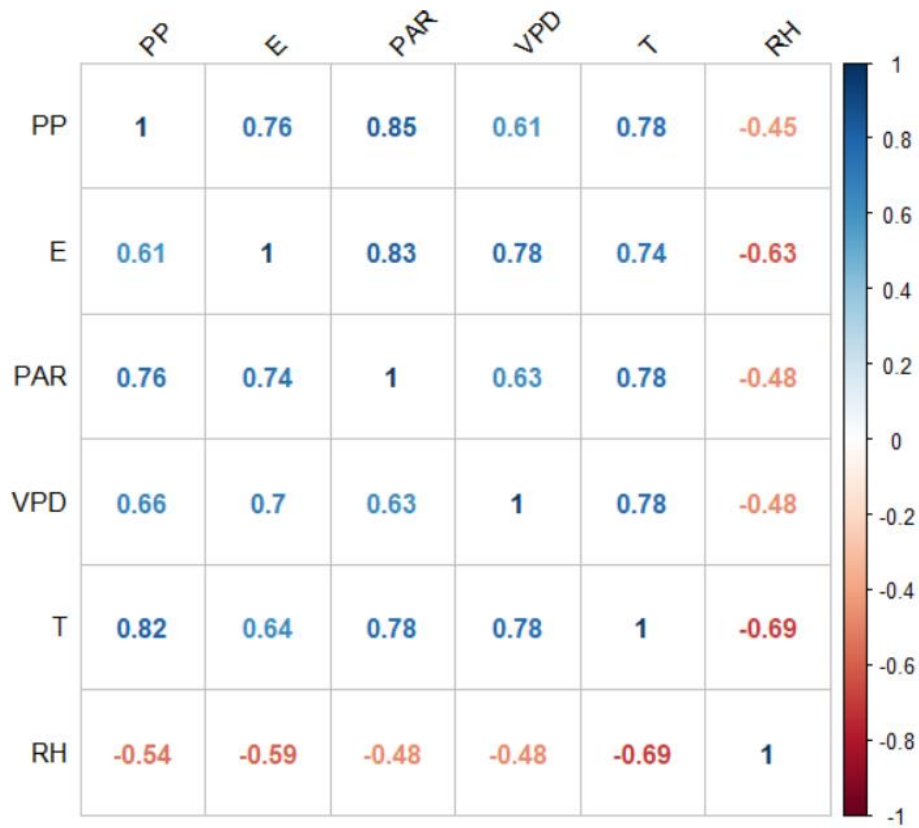

Supplemental Figure S16: Repeated measures correlation matrix of transpiration rate (E), leaf patch clamp pressure (Pp) and climate variables (Photosynthetic active radiation, PAR; vapour-pressure deficit, VPD; air temperature, T; relative humidity, RH). Values above the diagonal represent significant correlation coefficients ( $p < 0.05$ ) of well-watered plants. Values below, the significant coefficients of the water deficit plants.
