# Supplementary material for: High‐throughput phenotyping reveals differential transpiration behaviour within the banana wild relatives highlighting diversity in drought tolerance
Source: PubMed Central journal article supplement — Plant Cell Environ. 2022 Mar 28;45(6):1647–63. doi: 10.1111/pce.14310 (PMC9310827; doi:10.1111/pce.14310), 2022-03-28
Supplement: PCE-45-1647-s003.pdf [file PCE-45-1647-s003.pdf]

# 1 Supplementary Tables

2 *Supplemental Table S1: Leaf area (LA) at the start and end of the experiment, water use (WU) and transpiration efficiency (TE) of*  
 3 *8 wild banana genotypes during the Phenodyn phenotyping experiment for well-watered (WW) and water deficit plants (WD).*  
 4 *Data represent mean  $\pm$ se (n = 7-8). Note that at the start of the experiment plants there was not yet a separation between WW*  
 5 *and WD (n=15-16). Additionally, LA at the start were obtained non-destructively by calibrating top and side view images as*  
 6 *described in Eq. 1. Different letters indicate significant differences between genotypes and treatments (P < 0.05; A>B>C>D>E>F).*  
 7 *G represents the genotype-effect, T the treatment effect and G x T the genotype treatment interaction (\*\*\*) for P<0.001, NA; not*  
 8 *applicable).*

| genotype            | LA at start (m <sup>2</sup> ) | LA at end (m <sup>2</sup> ) |               | WU (g H <sub>2</sub> O/day) |                | TE (g FW/l H <sub>2</sub> O) |                |
|---------------------|-------------------------------|-----------------------------|---------------|-----------------------------|----------------|------------------------------|----------------|
|                     | NA                            | WW                          | WD            | WW                          | WD             | WW                           | WD             |
| Balbisiana          | 0.020±0.001(E)                | 0.24±0.01(G)                | 0.15±0.01(HI) | 178.3±6.6(D)                | 92.3±7.6(I)    | 85.3±4.3(DEF)                | 101.5±3.9(CDE) |
| Banksii_11          | 0.052±0.002(B)                | 0.53±0.02(B)                | 0.34±0.01(E)  | 365.4±15.2(A)               | 160.9±6.6(DEF) | 87.1±3(DEF)                  | 117.7±4.3(BC)  |
| Banksii_17          | 0.062±0.002(A)                | 0.62±0.02(A)                | 0.36±0.01(E)  | 359.8±19.4(A)               | 147.7±8.8(DEF) | 90.8±4.4(DEF)                | 113±5.9(BC)    |
| Burmannicoides      | 0.066±0.002(A)                | 0.54±0.02(B)                | 0.35±0.01(E)  | 335.2±8.8(AB)               | 173.7±12.9(DE) | 72.2±2.4(F)                  | 88.7±2.6(DEF)  |
| Errans              | 0.03±0.001(D)                 | 0.18±0.02(H)                | 0.12±0.01(I)  | 113.3±9(GHI)                | 46.9±6.2(J)    | 100±4.1(CDE)                 | 169.4±18.8(A)  |
| Malaccensis_33      | 0.042±0.002(C)                | 0.43±0.01(D)                | 0.29±0.01(F)  | 239.3±16.8(C)               | 104±6.4(HI)    | 90.6±4.9(DEF)                | 123.4±6.8(B)   |
| Malaccensis_ITC0074 | 0.065±0.002(A)                | 0.47±0.02(C)                | 0.32±0.01(EF) | 267.7±10.2(C)               | 143.4±7.5(EFG) | 86.4±2.4(DEF)                | 104.6±4.1(BCD) |
| Microcarpa          | 0.032±0.002(D)                | 0.47±0.02(CD)               | 0.29±0.01(F)  | 312.2±14.6(B)               | 129±9.7(FGH)   | 82.5±2.4(EF)                 | 119.1±7.4(BC)  |
| G                   | ***                           | ***                         |               | ***                         |                | ***                          |                |
| T                   | NA                            | ***                         |               | ***                         |                | ***                          |                |
| G x T               | NA                            | ***                         |               | ***                         |                | ***                          |                |

9

10

11 *Supplemental Table S2: Leaf area (LA) at the start and end of the experiment, water use (WU) and transpiration efficiency (TE) of*  
 12 *3 wild banana genotypes during the second phenotyping experiment for well-watered (WW) and water deficit plants (WD). Data*  
 13 *of LA represent mean  $\pm$ se of the second set of plants put on the balances ( $n_{WW} = 4$  &  $n_{WD} = 4$ ), data of WU and TE represent mean*  
 14  *$\pm$ se of the all plants included in the experiment ( $n_{WW} = 4$  &  $n_{WD} = 8$ ). Note that at the start of the experiment plants there was not*  
 15 *yet a separation between WW and WD. Additionally, LA at the start were obtained non-destructively by calibrating top and side*  
 16 *view images as described in Eq. 1. Different letters indicate significant differences between genotypes and treatments ( $P < 0.05$ ;*  
 17  *$A > B > C$ ). G represents the genotype-effect, T the treatment effect and G x T the genotype treatment interaction (n.s. for not*  
 18 *significant, \*\* for  $P < 0.01$ , \*\*\* for  $P < 0.001$ ; NA; not applicable).*

| genotype              | LA at start (m <sup>2</sup> ) | LA at end (m <sup>2</sup> ) |                     | WU (g H <sub>2</sub> O/day) |                      | TE (g FW/l H <sub>2</sub> O) |                     |
|-----------------------|-------------------------------|-----------------------------|---------------------|-----------------------------|----------------------|------------------------------|---------------------|
|                       | NA                            | WW                          | WD                  | WW                          | WD                   | WW                           | WD                  |
| <b>Balbisiana</b>     | 0.037 $\pm$ 0.002 (B)         | 0.60 $\pm$ 0.06 (B)         | 0.50 $\pm$ 0.03 (B) | 175.1 $\pm$ 16.9 (B)        | 114.9 $\pm$ 8.6 (C)  | 70.1 $\pm$ 2.8 (A)           | 57.3 $\pm$ 7 (A)    |
| <b>Banksii_11</b>     | 0.059 $\pm$ 0.003 (A)         | 1.26 $\pm$ 0.14 (A)         | 0.67 $\pm$ 0.04 (B) | 335.4 $\pm$ 30.1 (A)        | 125 $\pm$ 8 (C)      | 79.2 $\pm$ 5 (A)             | 72.5 $\pm$ 11.5 (A) |
| <b>Malaccensis_33</b> | 0.069 $\pm$ 0.007 (A)         | 1.33 $\pm$ 0.10 (A)         | 0.71 $\pm$ 0.07 (B) | 325.6 $\pm$ 15.9 (A)        | 127.1 $\pm$ 11.1 (C) | 84.6 $\pm$ 1.4 (A)           | 67.3 $\pm$ 12.2 (A) |
| <b>G</b>              | ***                           | ***                         |                     | ***                         |                      | n.s.                         |                     |
| <b>T</b>              | NA                            | ***                         |                     | ***                         |                      | n.s.                         |                     |
| <b>G x T</b>          | NA                            | **                          |                     | ***                         |                      | n.s.                         |                     |

19

20

21 *Supplemental Table S3: Parameter estimates of the Jarvis-Stewart model for both phenotyping experiments (Eq 9-12). Data*  
 22 *represent the optimal parameter value and the 95% confidence interval within brackets.  $E_{max}$  represents the maximum*  
 23 *transpiration rate;  $SWC_{crit}$ ; critical soil water content threshold at which transpiration rate starts to decrease;  $SWC_{slope}$ ; slope of*  
 24 *transpiration rate decrease with decreasing soil water content after  $SWC_{crit}$ ;  $SWC_{wilt}$ , the soil water content at which water uptake*  
 25 *and consequently transpiration is halted ;  $k_1$ , parameter describing the sensitivity of the light response;  $k_2$ , parameter describing*  
 26 *the sensitivity of the vapour pressure deficit response.*

| genotype                                      | $E_{max}$ (g cm <sup>-2</sup> h <sup>-1</sup> ) | $SWC_{crit}$ (g g <sup>-1</sup> ) | $SWC_{slope}$ (g cm <sup>-2</sup> h <sup>-1</sup> ) | $SWC_{wilt}$ (g g <sup>-1</sup> ) | $k_1$                  | $k_2$            |
|-----------------------------------------------|-------------------------------------------------|-----------------------------------|-----------------------------------------------------|-----------------------------------|------------------------|------------------|
| <b>High-throughput phenotyping experiment</b> |                                                 |                                   |                                                     |                                   |                        |                  |
| Balbisiana                                    | 0.024 [0.023;0.026]                             | 1.10 [1.08;1.13]                  | 0.030 [0.028;0.32]                                  | 0.29 [0.26;0.30]                  | 58.22 [51.62;65.37]    | 0.31 [0.28;0.33] |
| Banksii_11                                    | 0.020 [0.019;0.021]                             | 1.18 [1.17;1.19]                  | 0.023 [0.022;0.024]                                 | 0.31 [0.30;0.33]                  | 48.79 [43.34;54.33]    | 0.29 [0.27;0.31] |
| Banksii_17.8.1                                | 0.022 [0.021;0.023]                             | 1.20 [1.19;1.21]                  | 0.026 [0.025;0.028]                                 | 0.38 [0.36;0.39]                  | 95.29 [85.79;104.55]   | 0.27 [0.24;0.29] |
| Burmannicoides                                | 0.020 [0.019;0.021]                             | 1.21 [1.21;1.22]                  | 0.021 [0.020;0.022]                                 | 0.28 [0.26;0.29]                  | 45.91 [39.01;52.54]    | 0.24 [0.21;0.26] |
| Errans                                        | 0.021 [0.020;0.022]                             | 1.38 [1.35;1.40]                  | 0.030 [0.029;0.032]                                 | 0.68 [0.67;0.69]                  | 53.21 [46.56;59.88]    | 0.24 [0.21;0.26] |
| Malaccensis_33                                | 0.015 [0.015;0.016]                             | 1.28 [1.27;1.28]                  | 0.016 [0.016;0.017]                                 | 0.34 [0.33;0.36]                  | 28.21 [23.14;33.08]    | 0.26 [0.24;0.29] |
| Malaccensis_ITC0074                           | 0.018 [0.018;0.019]                             | 1.23 [1.21;1.25]                  | 0.018 [0.017;0.020]                                 | 0.22 [0.20;0.24]                  | 41.96 [33.16;51.51]    | 0.20 [0.18;0.22] |
| Microcarpa                                    | 0.024 [0.023;0.025]                             | 1.20 [1.19;1.21]                  | 0.028 [0.027;0.030]                                 | 0.37 [0.36;0.38]                  | 54.56 [48.90;60.41]    | 0.23 [0.21;0.26] |
| <b>Validation phenotyping experiment</b>      |                                                 |                                   |                                                     |                                   |                        |                  |
| Balbisiana                                    | 0.033 [0.032;0.035]                             | 1.82 [1.77;1.88]                  | 0.023 [0.021;0.024]                                 | 0.35 [0.29;0.29]                  | 109.61 [94.43;129.82]  | 0.08 [0.07;0.10] |
| Banksii_11                                    | 0.027 [0.026;0.028]                             | 2.14 [2.11;2.17]                  | 0.017 [0.016;0.017]                                 | 0.53 [0.51;0.51]                  | 75.69 [68.22;84.38]    | 0.13 [0.12;0.14] |
| Malaccensis_33                                | 0.023 [0.022;0.024]                             | 2.06 [2.03;2.09]                  | 0.015 [0.015;0.016]                                 | 0.57 [0.54;0.54]                  | 164.45 [133.34;203.50] | 0.11 [0.08;0.13] |

27

28

29
